# Supplementary material for: Improving Treatment Together: a protocol for a multi-phase, community-based participatory, and co-design project to improve youth opioid treatment service experiences in British Columbia
Source: Springer Nature journal article supplement (doi:10.1186/s13722-021-00261-7), 2021-08-14
Supplement: MOESM1 [file 19571200]

Additional File 1: Phase 1 Design, Workshop Activities Schedule and Supporting Materials

**Figure 1. Phase 1 human-centred co-design thinking process (Adapted from Design Council)<sup>1</sup>**

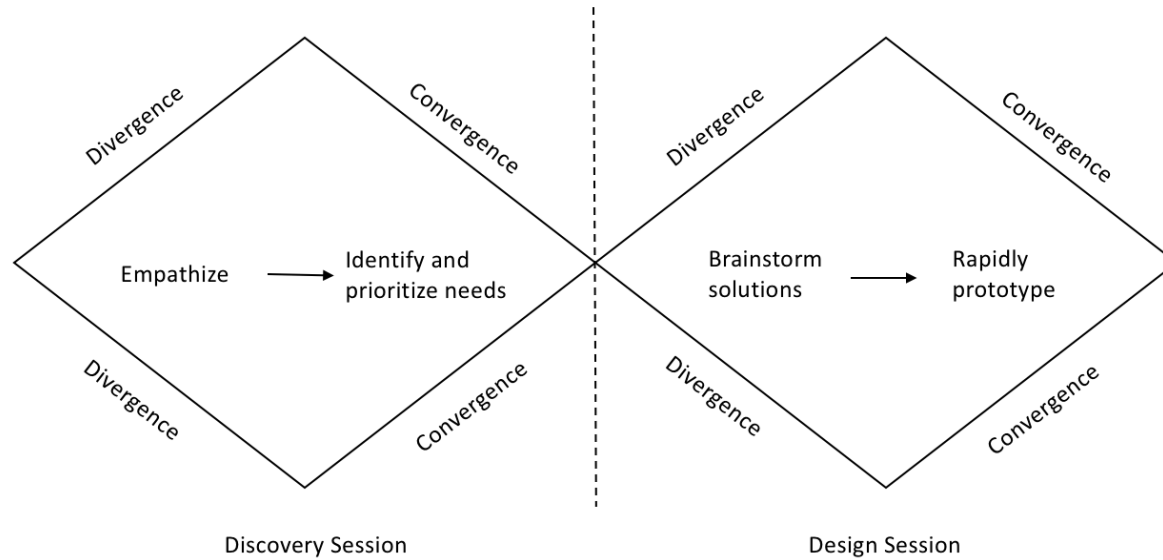

**Figure notes:**

In the Discovery session, divergent design thinking was used to broadly understand the set of people’s experiences with opioid treatment services and to converge these experiences into problem statements around the critical needs to be designed around.

In the Design session, divergent thinking was used to brainstorm as many solutions as possible and then to converge these solutions to a limited number of solutions to be selected for rapid prototyping.

<sup>1</sup> Design Council. The double diamond: A universally accepted depiction of the design process. <https://www.designcouncil.org.uk/news-opinion/double-diamond-universally-accepted-depiction-design-process>

**Figure 2. Phase 1 Workshop Schedule by Session**

**Discovery Session (3.5 hours) – START TIME: 8:30AM**

|         |                                                                                               |
|---------|-----------------------------------------------------------------------------------------------|
| 15 mins | Arrival and individual informed consent                                                       |
| 30 mins | Introductions and Creating a Safe Space                                                       |
| 45 mins | Understanding experiences: what is it like in your community/context?                         |
| 15 mins | Break                                                                                         |
| 30 mins | Understanding experiences continued: what is it like in your community/context?               |
| 60 mins | Understanding needs: where are the opportunities in your community/context?<br>What are they? |
| 15 mins | Wrap-up                                                                                       |

*\*One-hour meal break - catered\**

**Design Session (3.5 Hours) – START TIME: 1:00PM**

|         |                                                                                          |
|---------|------------------------------------------------------------------------------------------|
| 15 mins | Arrival and individual informed consent (those who missed morning session)               |
| 15 mins | Welcome and Introductions                                                                |
| 30 mins | Understand the opportunities: Review the findings (and needs) from the Discovery Session |
| 45 mins | Design solutions: Generate ideas for meeting the needs/opportunities                     |
| 15 mins | Break                                                                                    |
| 75 mins | Design solutions continued: prototype ideas, refine prototype design                     |
| 15 mins | Wrap-up                                                                                  |

**Figure 3. Empathy Map Handout (Adapted with support and permission from Overlap Associates<sup>2</sup>)**

Put yourself into those moments of direct interaction. Map out all of the different elements of those experiences. You can be as conceptual or as literal as you would like but try not to focus on just one specific experience. Try to pick out those things that happen for you across experiences, things that keep coming up.

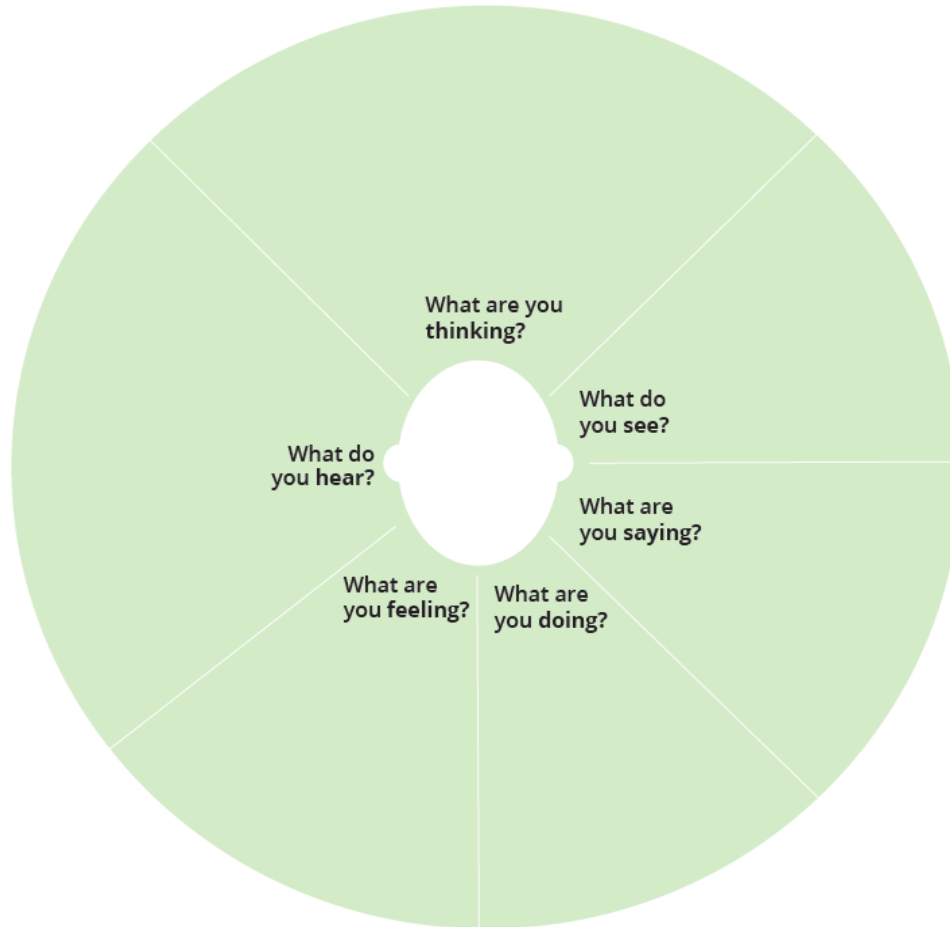


---

What were you trying to achieve?

- 1.
- 2.
- 3.

---

What do/did you need to achieve this?

- 1.
- 2.
- 3.

---

What made it difficult to achieve the above?

- 1.
  - 2.
  - 3.
- 

<sup>2</sup> Overlap Associates. Empathy map. Kitchener, ON: <https://overlapassociates.com/ideas/how-to-use-an-empathy-map/>; 2018.

**Figure 4. Journey Map Handout (Adapted with support and permission from Overlap Associates<sup>3</sup>)**

| At each step:                             | Step #: _____<br>Deciding to get help/access services | Step #: _____<br>Figuring out how/ where to access services | Step #: _____<br>Receiving services | Step #: _____<br>After receiving services |
|-------------------------------------------|-------------------------------------------------------|-------------------------------------------------------------|-------------------------------------|-------------------------------------------|
| What did you expect or hope would happen? |                                                       |                                                             |                                     |                                           |
| What actually happened (+/-)?             | +                                                     | +                                                           | +                                   | +                                         |
|                                           | -                                                     | -                                                           | -                                   | -                                         |
| What would have improved the experience?  |                                                       |                                                             |                                     |                                           |

<sup>3</sup> Overlap Associates. Journey map. Kitchener, ON: <https://overlapassociates.com/resources/journey-map/>; 2018.



**Figure 6. Prototype Pitch Handout (Adapted with support and permission from Overlap Associates<sup>5</sup>)**

Before or while you're creating your prototype, fill out these details about your design idea. Write out the "How might we ...?" statement that you designed around, as well as the opportunity or theme(s) that inspired your "How might we ...?" statement. List out the impact (or impacts) you hope your design will have (be as specific as possible). Finally, provide a short, written description of your design idea (think about who, what, where, how – once again, try to be specific). This handout will help you deliver your pitch for your prototype in the next activity!

**HOW MIGHT WE:**

Opportunities/Themes that informed your design:

- 
- 

Intended impact(s) of your design idea:

- 
- 

Description of your design idea (what, when, where, how): \_\_\_\_\_

\_\_\_\_\_

\_\_\_\_\_

\_\_\_\_\_

<sup>5</sup> Overlap Associates. Resources. Kitchener, ON: <https://overlapassociates.com/resources/>; 2018.
