# Supplementary material for: Improving Treatment Together: a protocol for a multi-phase, community-based participatory, and co-design project to improve youth opioid treatment service experiences in British Columbia
Source: Springer Nature journal article supplement (doi:10.1186/s13722-021-00261-7), 2021-08-14
Supplement: MOESM2 [file 19571200]

**Additional File 2: Phase 2 Prototype Selection**

**Table 1. Major activities for Phase 2 prototype selection**

|                                                                                                                                                                                                                                                                                                                                                                                                                                                                                                                                                                                                                     |
|---------------------------------------------------------------------------------------------------------------------------------------------------------------------------------------------------------------------------------------------------------------------------------------------------------------------------------------------------------------------------------------------------------------------------------------------------------------------------------------------------------------------------------------------------------------------------------------------------------------------|
| 1. Create community and stakeholder specific prototype summary tables <ul style="list-style-type: none"> <li>○ Highlight similarities between prototypes</li> </ul>                                                                                                                                                                                                                                                                                                                                                                                                                                                 |
| 2. Collapse table by combining similar prototypes together (can note differences and identify what is most feasible in step 3)                                                                                                                                                                                                                                                                                                                                                                                                                                                                                      |
| 3. Determine which prototypes are feasible based on the following Internal Rubric: <ul style="list-style-type: none"> <li>○ Was the prototype identified by multiple participant groups? At multiple centers?</li> <li>○ What is the estimated cost of developing this idea?</li> <li>○ Can the idea be developed within our Phase 2 timeline?</li> <li>○ Is the prototype scalable to other communities and other populations?</li> <li>○ Is the prototype sustainable, such that it can be maintained after the project is completed?</li> <li>○ Can this prototype be developed in a virtual context?</li> </ul> |
| 4. Conduct an environmental scan to ensure that prototypes are not already under development elsewhere                                                                                                                                                                                                                                                                                                                                                                                                                                                                                                              |
| 5. Create a final list of prototypes to present to the community partners and youth team members, including the rationale for choosing each prototype (from step 3)                                                                                                                                                                                                                                                                                                                                                                                                                                                 |
| 6. Present and discuss the final list of prototypes to the community partners and youth team members <ul style="list-style-type: none"> <li>○ Send prototypes via email, include External Rubric for selecting prototypes (see Table 2)</li> </ul>                                                                                                                                                                                                                                                                                                                                                                  |
| 7. Hold a prototype decision-making meeting with all of the community partners                                                                                                                                                                                                                                                                                                                                                                                                                                                                                                                                      |
| 8. Share final selection of prototypes with local, provincial and national partners                                                                                                                                                                                                                                                                                                                                                                                                                                                                                                                                 |

**Table 2. External rubric for selecting prototype**

| <b>CRITERIA</b>                   | <b>GUIDING QUESTION</b>                                                                                                                                                                                                                  |
|-----------------------------------|------------------------------------------------------------------------------------------------------------------------------------------------------------------------------------------------------------------------------------------|
| <b>Potential impact</b>           | If the idea was successful, would it make a key contribution to deepening impact in the community?<br>(1 = low impact; 7= high impact)                                                                                                   |
|                                   | Does the idea have the direct potential to improve treatment for youth experience harms from opioids?<br>(1= indirect potential;7= direct potential)                                                                                     |
| <b>Novelty</b>                    | How novel is the idea (i.e., does the idea already exist in some form)?<br>(1= already exists;7= new idea)<br>If it already exists in some form, does the prototype have potential for synergy with something that already exists? (Y/N) |
| <b>Organizational match</b>       | Is the idea consisted with the strengths and goals of the organization?                                                                                                                                                                  |
|                                   | Is the prototype sustainable following the end of the project without additional financial resources?                                                                                                                                    |
| <b>TOTAL SCORE</b>                | Add up the scores from the above categories                                                                                                                                                                                              |
| <b>Budget required</b>            | What is the estimated cost of developing this idea?                                                                                                                                                                                      |
| <b>Timeframe</b>                  | Can the idea be developed, testing and evaluated in 9-12 months?                                                                                                                                                                         |
| <b>Impact beyond this project</b> | Is the prototype scalable to other communities and other populations?<br>(i.e., would other regions or groups benefit from developing this idea??                                                                                        |
